# Supplementary material
Source: PubMed Central journal article supplement (PMC4419830)
Supplement: NIHMS676292-supplement-SUPP.pdf [file NIHMS676292-supplement-SUPP.pdf]

**pH-sensitive oncolytic adenovirus hybrid targeting acidic tumor microenvironment and angiogenesis**

Joung-Woo Choi<sup>1</sup>, Soo-Jung Jung<sup>1</sup>, Dayananda Kasala<sup>1</sup>, June Kyu Hwang<sup>1</sup>, Jun Hu<sup>2</sup>, You Han Bae<sup>2,3\*</sup> and Chae-Ok Yun<sup>1\*</sup>

<sup>1</sup>Department of Bioengineering, College of Engineering, Hanyang University, 222 Wangsinmi-ro, Seongdong-gu, Seoul, Republic of Korea,

<sup>2</sup>Department of Pharmaceutics and Pharmaceutical Chemistry, The University of Utah, 30 S 2000 E, Room 2972, Salt Lake City, UT 84112, USA

<sup>3</sup>Utah-Inha Drug Delivery Systems (DDS) and Advanced Therapeutics Research Center, 7-50 Songdo-dong, Yeonsu-gu, Incheon 406-840, Republic of Korea

---

\*Address correspondence and reprint request to Dr. Chae-Ok Yun or Dr. You Han Bae  
Dr. Chae-Ok Yun

Department of Bioengineering, College of Engineering, Hanyang University, 222 Wangsimni-ro, Seongdong-gu, Seoul, Republic of Korea

Tel: 82-2-2220-0491; Fax: 82-2-2220-4850

E-mail address: [chaeok@hanyang.ac.kr](mailto:chaeok@hanyang.ac.kr)

Dr. You Han Bae

Department of Pharmaceutics and Pharmaceutical Chemistry,  
University of Utah, Skaggs Research Building, Rm 2972, 30S, 2000E, Salt Lake City, 84112,  
USA. Tel.: +1 801 585 1518; Fax: +1 801 585 3614.

E-mail address: [you.bae@utah.edu](mailto:you.bae@utah.edu)

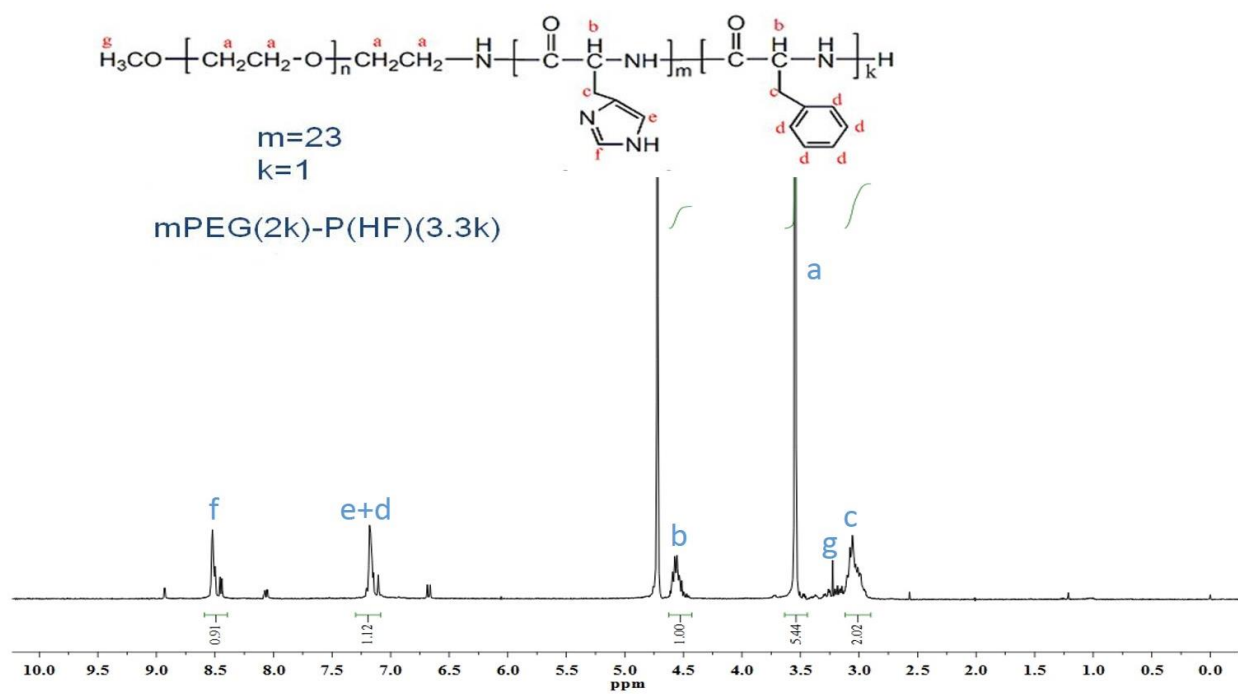

**Fig. S1.**  $^1\text{H}$  NMR spectrum of PEGbPHF in  $\text{D}_2\text{O}/\text{DCI}$  (1mL  $\text{D}_2\text{O}$ +20 $\mu\text{L}$  DCI) at 25  $^\circ\text{C}$ .

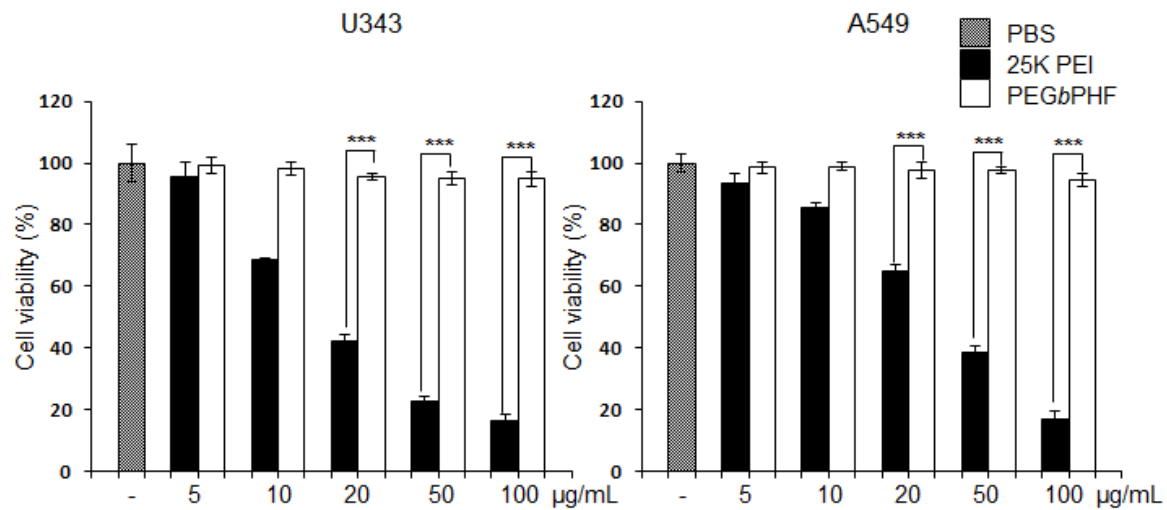

**Fig. S2.** Effect of 25K PEI and PEGbPHF on cell viability. U343 and A549 cells were treated with PBS, 25K PEI, or PEGbPHF, followed by an MTT assay at 48 h post treatment. Results were normalized against the negative control (PBS). Each value represents mean  $\pm$  SD of three separate experiments (n = 3 per experiment). \*\*\* $P < 0.001$  versus 25K PEI.

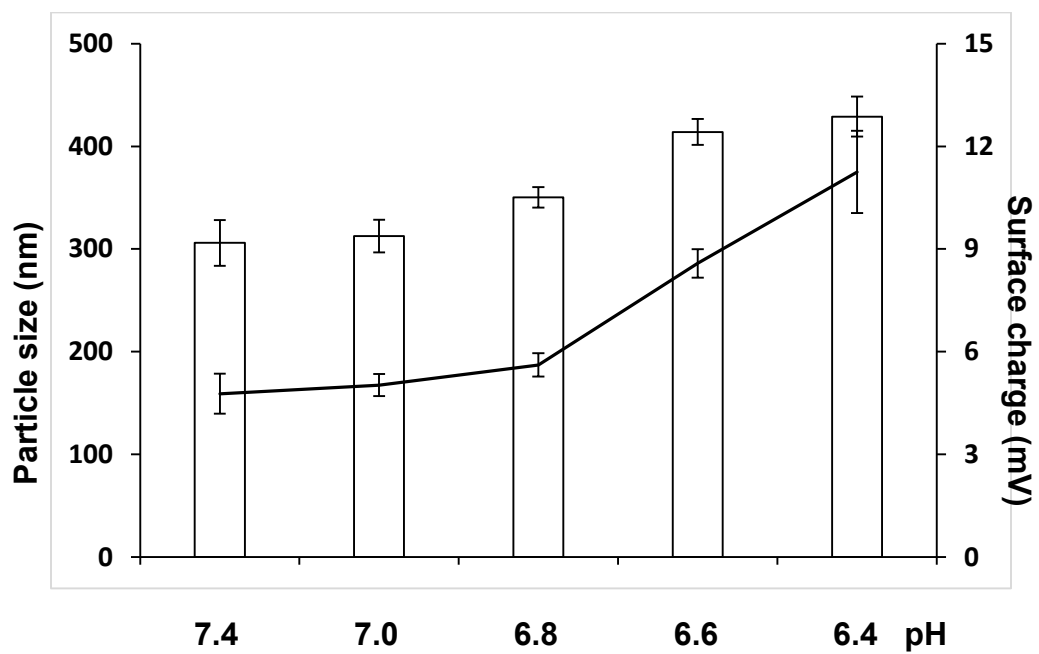

**Fig. S3.** Particle size and zeta-potential as a function of pH (7.4–6.4). The average size (nm) and zeta-potential value (mV) of dE1/GFP ( $1 \times 10^{10}$  VP) were measured at various pH from 7.4 to 6.4. The data represent the means  $\pm$  SD for three replicates.

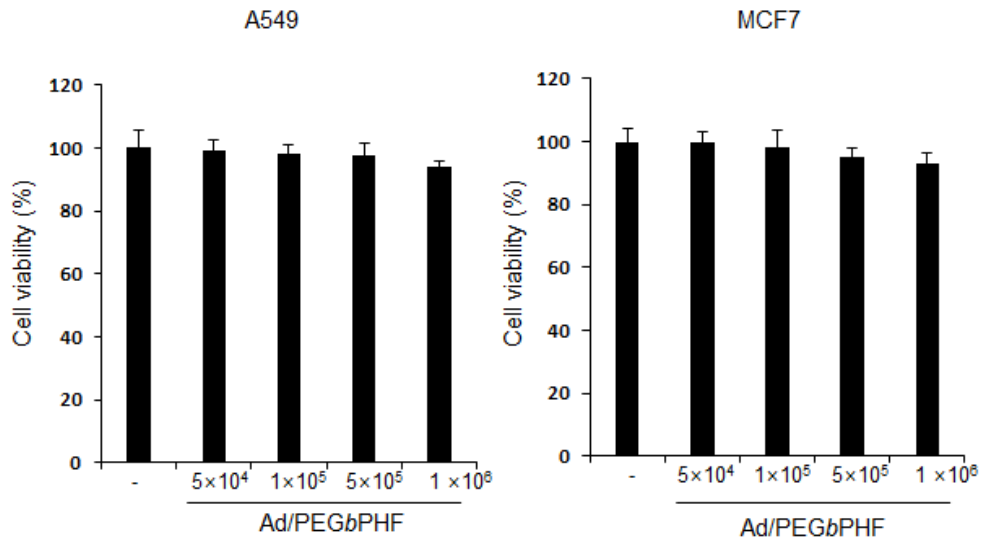

**Fig. S4.** Effect of Ad/PEGbPHF complex on cell viability. A549 and MCF7 cells were treated with various Ad/PEGbPHF ratios, followed by an MTT assay at 48 h post treatment. Results were normalized against the negative control (PBS). Each value represents mean  $\pm$  SD of three separate experiments (n = 3 per experiment).

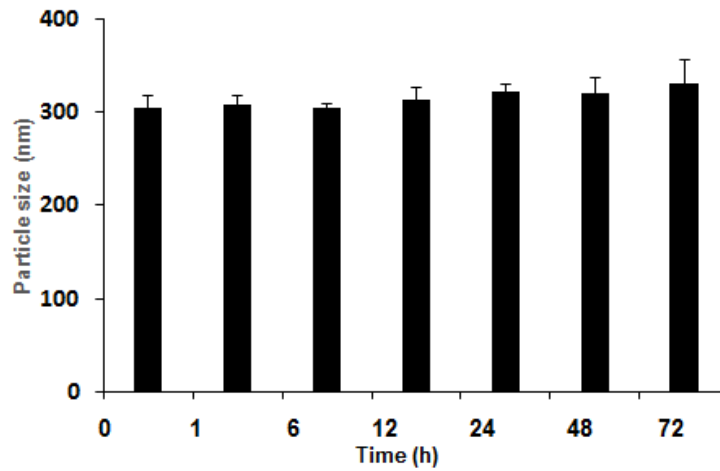

**Fig. S5.** Stability evaluation of dE1/GFP/PEGbPHF. dE1/GFP/PEGbPHF (1:  $1 \times 10^6$  ratio) complex was dispersed in phosphate saline buffer (PBS) at room temperature, and the average size of Ad/PEGbPHF was measured at pre-determined time intervals from 0 to 72 h. The data represent the means  $\pm$  SD for three replicates

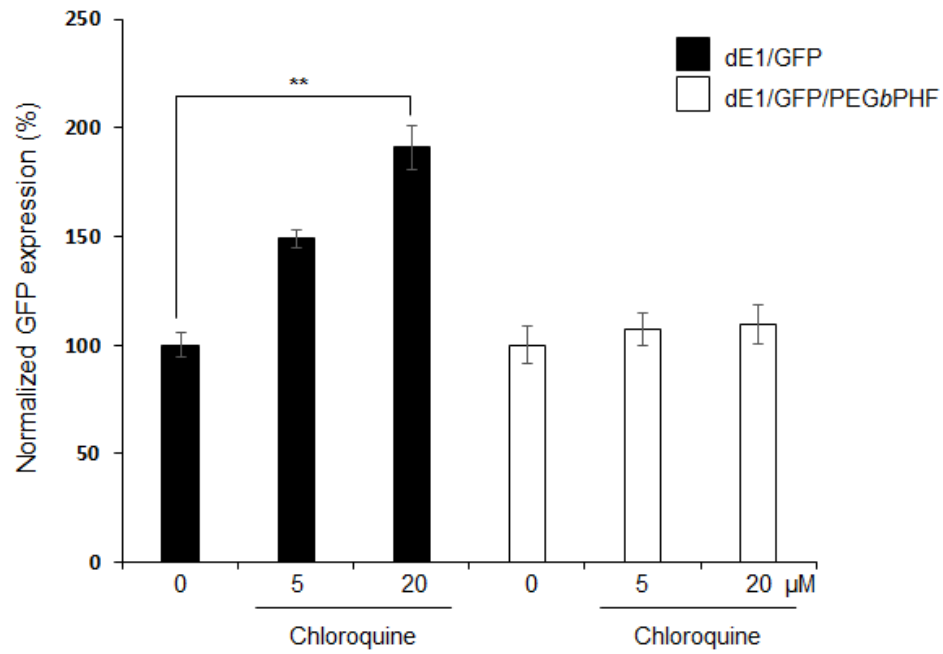

**Fig. S6.** Transduction efficiency of naked dE1/GFP and dE1/GFP/PEGbPHF (1: 1 x 10<sup>6</sup> ratio) in the presence or absence of chloroquine (CQ) in A549 cells. Relative transduction efficiency: experimental values / control values. The data represent the means ± SD for three replicates
